# Supplementary material
Source: publisher site journal article supplement (https://www.spandidos-publications.com/3002/downloadSupplementary)

Figure S1. ROC Curves for Coagulopathy Defined as FDP >10 mg/ml based upon serum ALT/LDH Ratio. ROC was performed for coagulopathy defined as FDP >10 mg/ml based on ALT/LDH ratio. Area under the curve (AUC) was 0.77. ROC, Receiver Operating Characteristic; FDP, fibrin degradation products; ALT, aminotransferase; LDH, lactate dehydrogenase ratio.

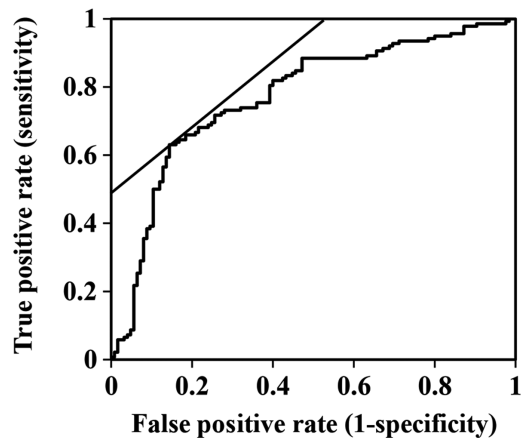

Supplement: Supplementary file [file downloadSupplementary]
